# Supplementary material for: Molecular Dynamics Simulations of Cellulose and Dialcohol Cellulose under Dry and Moist Conditions
Source: PubMed Central journal article supplement (PMC10265663; doi:10.1021/acs.biomac.3c00156), 2023-05-11
Supplement: bm3c00156_si_001.pdf [file bm3c00156_si_001.pdf]

## Supplementary Information

# Molecular Dynamics Simulations of Cellulose and Dialcohol Cellulose in Dry and Moist Conditions

Patric Elf<sup>1,3</sup>, Hüsametdin Deniz Özeren<sup>6</sup>, Per Larsson<sup>1,3</sup>, Anette Larsson<sup>2,4</sup>, Lars Wågberg<sup>1,3</sup>, Robin Nilsson<sup>2,4</sup>, Poppy Chaiyupatham<sup>2</sup>, Mikael S. Hedenqvist<sup>1,3\*</sup>, Fritjof Nilsson<sup>1,5\*</sup>

<sup>1</sup>School of Engineering Sciences in Chemistry, Biotechnology and Health,  
Fibre and Polymer Technology, KTH Royal Institute of Technology,  
SE-100 44 Stockholm, Sweden

<sup>2</sup>Department of Chemistry and Chemical Engineering, Chalmers University of Technology,  
SE-412 96 Gothenburg, Sweden

<sup>3</sup>FibRe Centre for Lignocellulose-based Thermoplastics, KTH Royal Institute of Technology,  
Stockholm, Sweden

<sup>4</sup>FibRe Centre for Lignocellulose-based Thermoplastics, Chalmers University of Technology,  
SE-412 96 Gothenburg, Sweden

<sup>5</sup>FSCN research centre, Mid Sweden University, 85170 Sundsvall, Sweden

<sup>6</sup>Division of Glycoscience, Department of Chemistry, AlbaNova University Centre, KTH  
Royal Institute of Technology, SE-106 91 Stockholm, Sweden

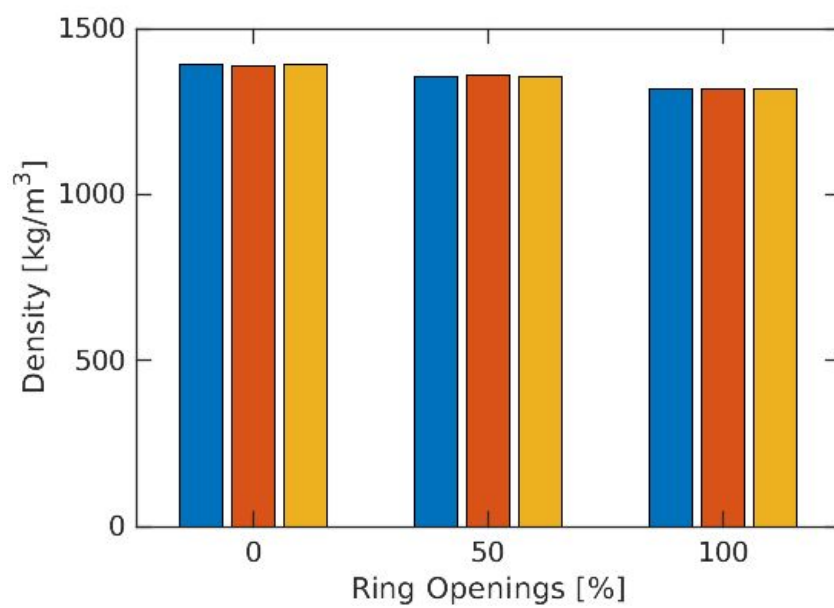

**Figure S1.** Density of dry material with different degrees of ring-opening at 23 °C as triplicates.

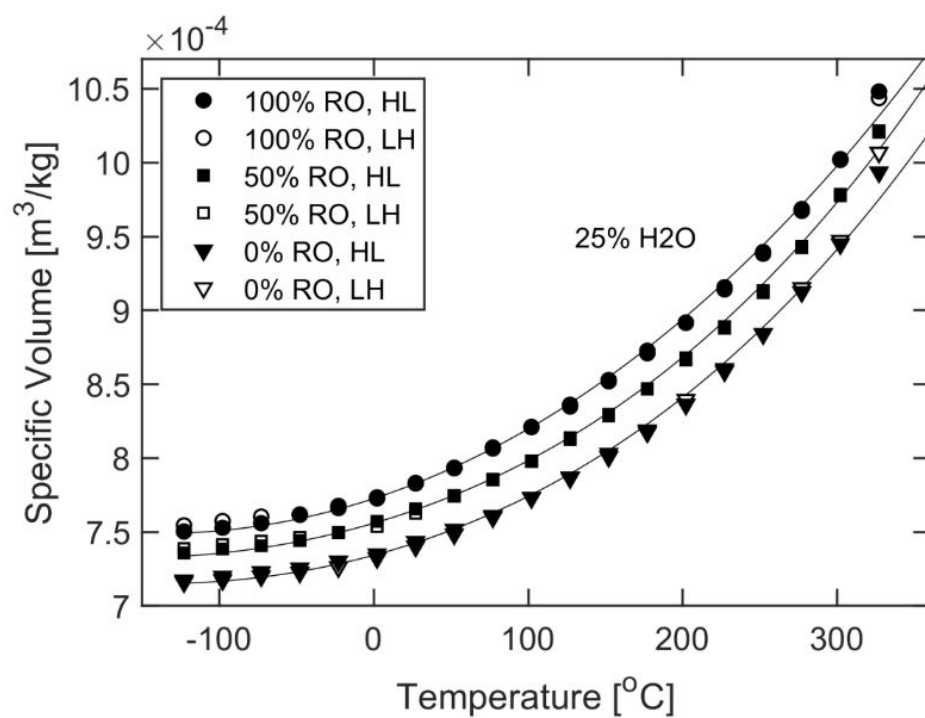

**Figure S2.** Specific volume versus temperature and degree of ring opening for 25 % water systems starting from low-to-high (LH) and then high-to-low (HL) temperatures, respectively.

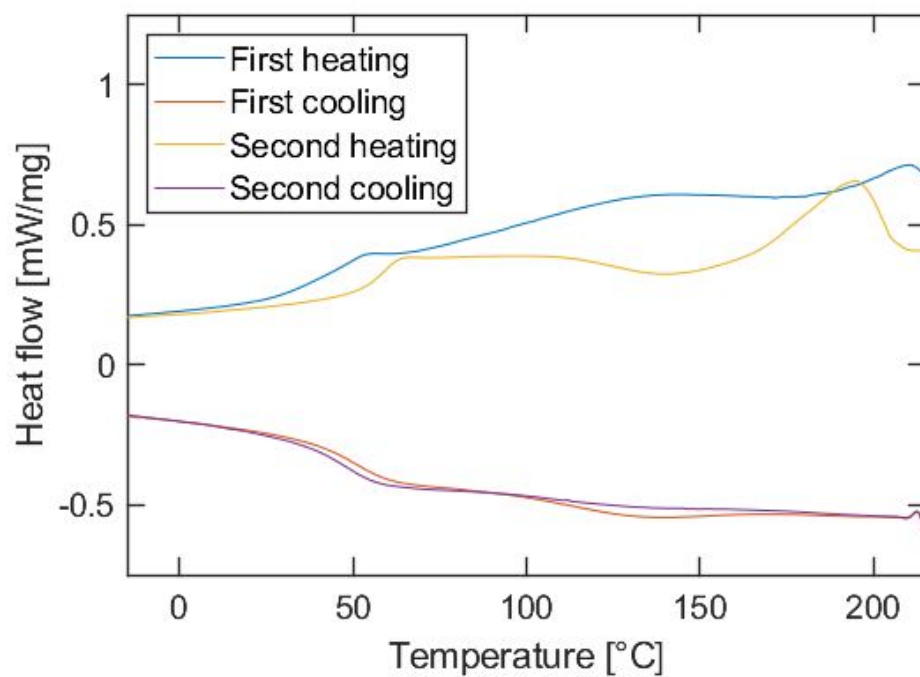

**Figure S3.** Heating and cooling thermograms of the dialcohol cellulose film. Endothermal signal is up.

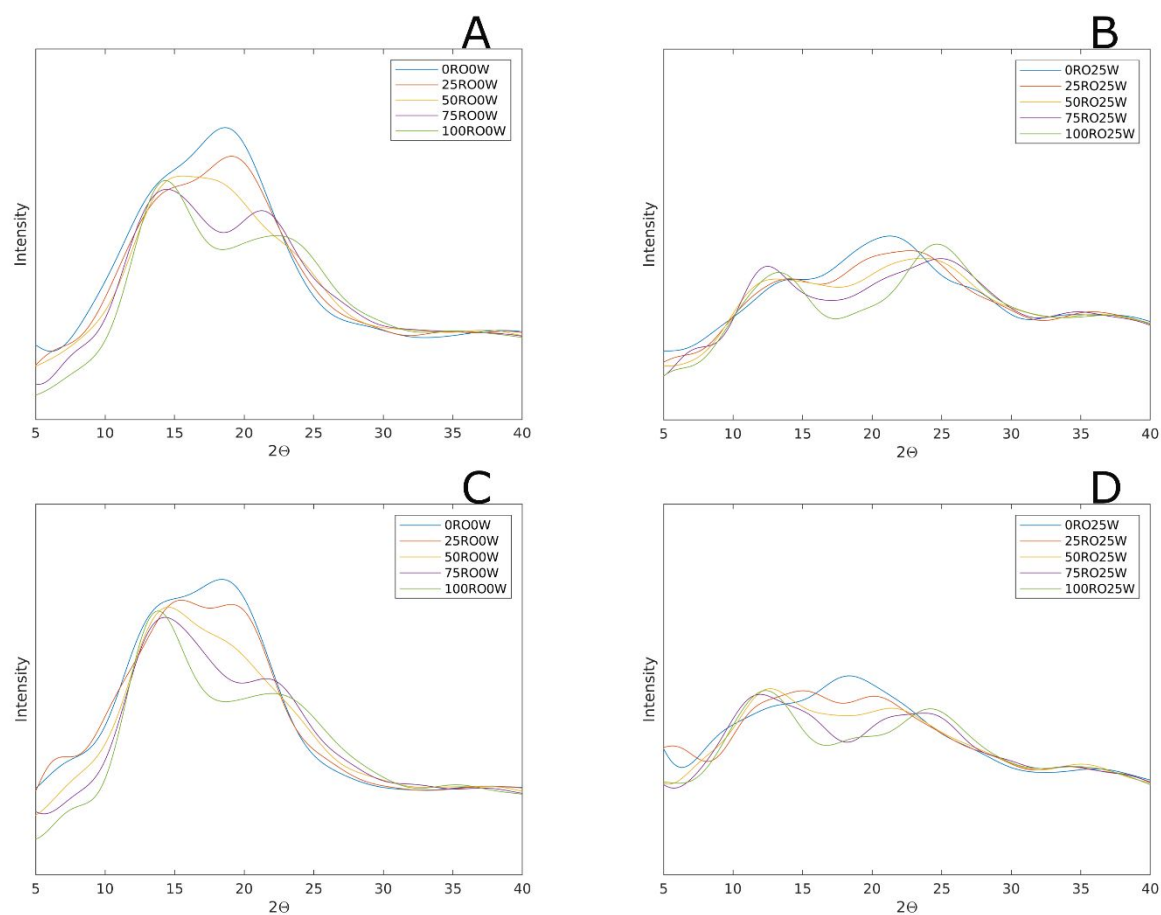

**Figure S4.** Simulated XRD-spectra for different degrees of ring-openings between 0 and 100 %. **(a)** 23 °C, dry **(b)** 23 °C, wet **(c)** 150 °C, dry **(d)** 150 °C, wet.

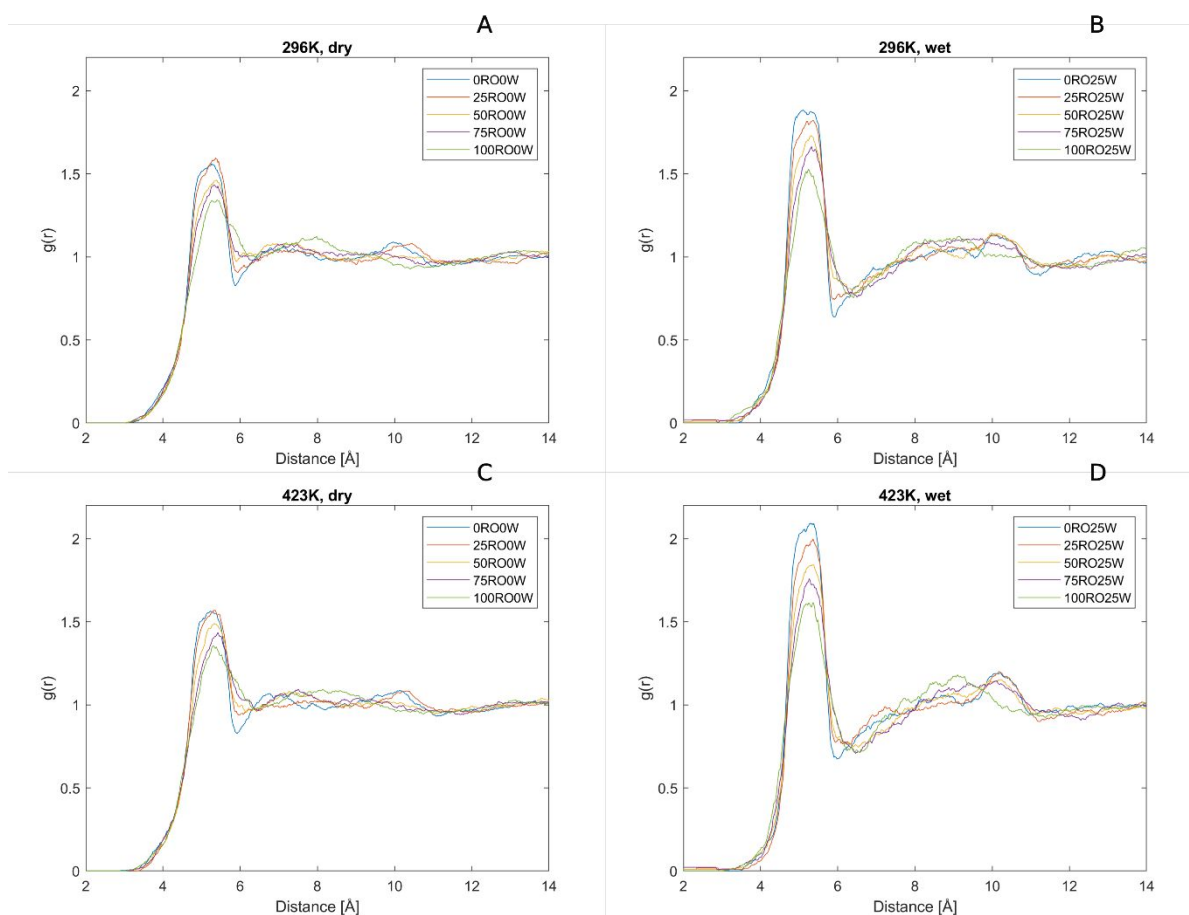

**Figure S5.** Radial distribution functions of the C4 atoms, smoothed curves, (a) 23°C, dry (b) 23°C, wet (c) 150°C, dry (d) 150°C, wet.

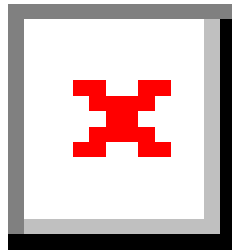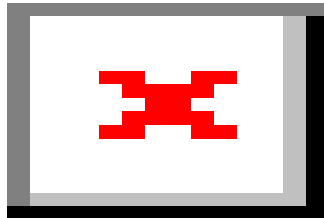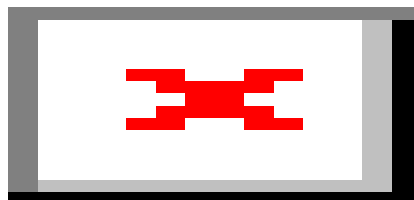

**Figure S6.** Representative MD boxes of a wet 100% dialcohol cellulose system with 16 polymer chains, each with different color. From top to bottom: 0, 50 and 100 % strain.

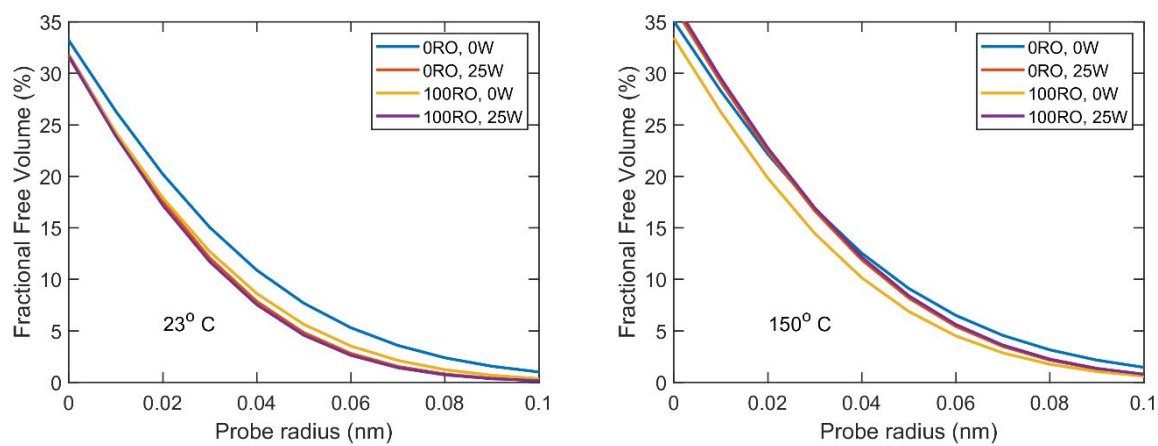

**Figure S6.** Fractional free volume versus probe radius, humidity and temperature.



A modified version of the CHARMM36-feb2021.ff forcefield was used. An .rtp file containing the residues was added, as well as definitions to the “ffbonded.itp” file. The charge distribution for the cellulose residue types was taken from the CHARMM36 Glycan Reader & Modeler charges, with slight modifications for the dialcohol cellulose residue to have a net zero charge for each polymer chain. The definitions added in “ffbonded.itp” was taken as similar angles/dihedrals already present in the CHARMM36 force field, just with the atomtypes replaced.

**Table S1.** Charge distribution, derived from CHARMM36 with minor modifications. BLC, GLC and TLC are the beginning, middle and terminal unit of the cellulose polymer chain, and BL1, GL1 TL1 are the corresponding ones for the units in the dialcohol cellulose polymer chains.

| BLC   |      |          |        | GLC   |          |        | TLC   |          |        |
|-------|------|----------|--------|-------|----------|--------|-------|----------|--------|
| No.   | Atom | Atomtype | Charge | Atom  | Atomtype | Charge | Atom  | Atomtype | Charge |
| 0     | C1   | CC3162   | 0.34   | C1    | CC3162   | 0.29   | C1    | CC3162   | 0.29   |
| 1     | H1   | HCA1     | 0.09   | H1    | HCA1     | 0.09   | H1    | HCA1     | 0.09   |
| 2     | O1   | OC311    | -0.65  | C5    | CC3163   | 0.11   | C5    | CC3163   | 0.11   |
| 3     | HO1  | HCP1     | 0.42   | H5    | HCA1     | 0.09   | H5    | HCA1     | 0.09   |
| 4     | C5   | CC3163   | 0.11   | O5    | OC3C61   | -0.4   | O5    | OC3C61   | -0.4   |
| 5     | H5   | HCA1     | 0.09   | C2    | CC3161   | 0.14   | C2    | CC3161   | 0.14   |
| 6     | O5   | OC3C61   | -0.4   | H2    | HCA1     | 0.09   | H2    | HCA1     | 0.09   |
| 7     | C2   | CC3161   | 0.14   | O2    | OC311    | -0.65  | O2    | OC311    | -0.65  |
| 8     | H2   | HCA1     | 0.09   | HO2   | HCP1     | 0.42   | HO2   | HCP1     | 0.42   |
| 9     | O2   | OC311    | -0.65  | C3    | CC3161   | 0.14   | C3    | CC3161   | 0.14   |
| 10    | HO2  | HCP1     | 0.42   | H3    | HCA1     | 0.09   | H3    | HCA1     | 0.09   |
| 11    | C3   | CC3161   | 0.14   | O3    | OC311    | -0.65  | O3    | OC311    | -0.65  |
| 12    | H3   | HCA1     | 0.09   | HO3   | HCP1     | 0.42   | HO3   | HCP1     | 0.42   |
| 13    | O3   | OC311    | -0.65  | C4    | CC3161   | 0.09   | C4    | CC3161   | 0.14   |
| 14    | HO3  | HCP1     | 0.42   | H4    | HCA1     | 0.09   | H4    | HCA1     | 0.09   |
| 15    | C4   | CC3161   | 0.09   | O4    | OC301    | -0.36  | O4    | OC311    | -0.65  |
| 16    | H4   | HCA1     | 0.09   | C6    | CC321    | 0.05   | HO4   | HCP1     | 0.42   |
| 17    | O4   | OC301    | -0.36  | H61   | HCA2     | 0.09   | C6    | CC321    | 0.05   |
| 18    | C6   | CC321    | 0.05   | H62   | HCA2     | 0.09   | H61   | HCA2     | 0.09   |
| 19    | H61  | HCA2     | 0.09   | O6    | OC311    | -0.65  | H62   | HCA2     | 0.09   |
| 20    | H62  | HCA2     | 0.09   | HO6   | HCP1     | 0.42   | O6    | OC311    | -0.65  |
| 21    | O6   | OC311    | -0.65  |       |          |        | HO6   | HCP1     | 0.42   |
| 22    | HO6  | HCP1     | 0.42   |       |          |        |       |          |        |
| Bonds |      |          |        | Bonds |          |        | Bonds |          |        |
|       | C1   | O1       |        | C1    | H1       |        | C1    | H1       |        |
|       | C1   | H1       |        | C1    | O5       |        | C1    | O5       |        |
|       | O1   | HO1      |        | C1    | C2       |        | C1    | C2       |        |
|       | C1   | O5       |        | C2    | H2       |        | C2    | H2       |        |
|       | C1   | C2       |        | C2    | O2       |        | C2    | O2       |        |
|       | C2   | H2       |        | O2    | HO2      |        | O2    | HO2      |        |
|       | C2   | O2       |        | C2    | C3       |        | C2    | C3       |        |
|       | O2   | HO2      |        | C3    | H3       |        | C3    | H3       |        |
|       | C2   | C3       |        | C3    | O3       |        | C3    | O3       |        |

|     | C3    | H3       |        | O3    | HO3      |        | O3    | HO3      |        |
|-----|-------|----------|--------|-------|----------|--------|-------|----------|--------|
|     | C3    | O3       |        | C3    | C4       |        | C3    | C4       |        |
|     | O3    | HO3      |        | C4    | H4       |        | C4    | H4       |        |
|     | C3    | C4       |        | C4    | O4       |        | C4    | O4       |        |
|     | C4    | H4       |        | C4    | C5       |        | O4    | HO4      |        |
|     | C4    | O4       |        | C5    | H5       |        | C4    | C5       |        |
|     | C4    | C5       |        | C5    | C6       |        | C5    | H5       |        |
|     | C5    | H5       |        | C6    | H61      |        | C5    | C6       |        |
|     | C5    | C6       |        | C6    | H62      |        | C6    | H61      |        |
|     | C6    | H61      |        | C6    | O6       |        | C6    | H62      |        |
|     | C6    | H62      |        | O6    | HO6      |        | C6    | O6       |        |
|     | C6    | O6       |        | C5    | O5       |        | O6    | HO6      |        |
|     | O6    | HO6      |        | O4    | +C1      |        | C5    | O5       |        |
|     | C5    | O5       |        |       |          |        |       |          |        |
|     | O4    | +C1      |        |       |          |        |       |          |        |
|     | BL1   |          |        | GL1   |          |        | TL1   |          |        |
| No. | Atom  | Atomtype | Charge | Atom  | Atomtype | Charge | Atom  | Atomtype | Charge |
| 0   | O4    | OC301    | -0.36  | O4    | OC301    | -0.36  | HO4   | HCP1     | 0.42   |
| 1   | C4    | CC311    | 0.09   | C4    | CC311    | 0.09   | O4    | OC301    | -0.4   |
| 2   | H4    | HCA1     | 0.09   | H4    | HCA1     | 0.09   | C4    | CC311    | 0.09   |
| 3   | C5    | CC311    | 0.11   | C5    | CC311    | 0.11   | H4    | HCA1     | 0.09   |
| 4   | C3    | CC321    | 0.05   | C3    | CC321    | 0.05   | C5    | CC311    | 0.11   |
| 5   | O5    | OC301    | -0.4   | O5    | OC301    | -0.4   | C3    | CC321    | 0.05   |
| 6   | H5    | HCA1     | 0.09   | H5    | HCA1     | 0.09   | O5    | OC301    | -0.4   |
| 7   | C6    | CC321    | 0.05   | C6    | CC321    | 0.05   | H5    | HCA1     | 0.09   |
| 8   | H3    | HCA2     | 0.09   | H3    | HCA2     | 0.09   | C6    | CC321    | 0.05   |
| 9   | O3    | OC311    | -0.65  | O3    | OC311    | -0.65  | H3    | HCA2     | 0.09   |
| 10  | H31   | HCA2     | 0.09   | H31   | HCA2     | 0.09   | H31   | HCA2     | 0.09   |
| 11  | C1    | CC311    | 0.34   | C1    | CC311    | 0.29   | C1    | CC311    | 0.09   |
| 12  | H61   | HCA2     | 0.09   | H61   | HCA2     | 0.09   | H61   | HCA2     | 0.09   |
| 13  | O6    | OC311    | -0.65  | O6    | OC311    | -0.65  | O6    | OC311    | -0.65  |
| 14  | H62   | HCA2     | 0.09   | H62   | HCA2     | 0.09   | H62   | HCA2     | 0.09   |
| 15  | HO3   | HCP1     | 0.42   | HO3   | HCP1     | 0.42   | HO3   | HCP1     | 0.42   |
| 16  | O1    | OC311    | -0.65  | H1    | HCA1     | 0.09   | O3    | OC311    | -0.65  |
| 17  | H1    | HCA1     | 0.09   | C2    | CC321    | 0.05   | H1    | HCA1     | 0.09   |
| 18  | C2    | CC321    | 0.05   | HO6   | HCP1     | 0.42   | C2    | CC321    | 0.05   |
| 19  | HO6   | HCP1     | 0.42   | H2    | HCA2     | 0.09   | HO6   | HCP1     | 0.42   |
| 20  | H2    | HCA1     | 0.09   | O2    | OC311    | -0.65  | H2    | HCA2     | 0.09   |
| 21  | O2    | OC311    | -0.65  | H21   | HCA2     | 0.09   | O2    | OC311    | -0.65  |
| 22  | H21   | HCA2     | 0.09   | HO2   | HCP1     | 0.42   | H21   | HCA2     | 0.09   |
| 23  | HO2   | HCP1     | 0.42   |       |          |        | HO2   | HCP1     | 0.42   |
| 24  | HO1   | HCP1     | 0.42   |       |          |        |       |          |        |
|     | Bonds |          |        | Bonds |          |        | Bonds |          |        |
|     | C1    | O1       |        | C1    | H1       |        | C1    | H1       |        |
|     | C1    | H1       |        | C1    | O5       |        | C1    | O5       |        |
|     | O1    | HO1      |        | C1    | C2       |        | C1    | C2       |        |

|    |     |    |     |    |     |
|----|-----|----|-----|----|-----|
| C1 | O5  | C2 | H2  | C2 | H2  |
| C1 | C2  | C2 | O2  | C2 | O2  |
| C2 | H2  | O2 | HO2 | O2 | HO2 |
| C2 | O2  | C3 | H3  | C3 | H3  |
| O2 | HO2 | C3 | O3  | C3 | O3  |
| C3 | H3  | O3 | HO3 | O3 | HO3 |
| C3 | O3  | C3 | C4  | C3 | C4  |
| O3 | HO3 | C4 | H4  | C4 | H4  |
| C3 | C4  | C4 | O4  | C4 | O4  |
| C4 | H4  | C4 | C5  | C4 | C5  |
| C4 | O4  | C5 | H5  | C5 | H5  |
| C4 | C5  | C5 | C6  | C5 | C6  |
| C5 | H5  | C6 | H61 | C6 | H61 |
| C5 | C6  | C6 | H62 | C6 | H62 |
| C6 | H61 | C6 | O6  | C6 | O6  |
| C6 | H62 | O6 | HO6 | O6 | HO6 |
| C6 | O6  | C5 | O5  | C5 | O5  |
| O6 | HO6 | C3 | H31 | C3 | H31 |
| C5 | O5  | C2 | H21 | C2 | H21 |
| C3 | H31 | O4 | +C1 | O4 | HO4 |
| C2 | H21 |    |     |    |     |
| O4 | +C1 |    |     |    |     |

**Table 2.** Added Definitions to ffbonded.itp in the charmm36-feb2021.ff forcefield.

| Angletypes    |        |        |       |        |         |         |         |
|---------------|--------|--------|-------|--------|---------|---------|---------|
| i             | j      | k      | func  | theta0 | ktheta  | ub0     | kub     |
| CC311         | OC301  | CC311  | 5     | 109.7  | 794.96  | 0       | 0       |
| OC301         | CC311  | CC311  | 5     | 111.5  | 376.56  | 0       | 0       |
| OC301         | CC311  | CC321  | 5     | 111.5  | 376.56  | 0       | 0       |
| HCA1          | CC311  | OC301  | 5     | 109.5  | 502.08  | 0       | 0       |
| CC3161        | OC301  | CC311  | 5     | 109.7  | 794.96  | 0       | 0       |
| HCA1          | CC311  | CC321  | 5     | 110.1  | 288.696 | 0.2179  | 18853.1 |
| HCA1          | CC311  | CC311  | 5     | 110.1  | 288.696 | 0.2179  | 18853.1 |
| CC311         | CC311  | HCA1   | 5     | 110.1  | 288.696 | 0.2179  | 18853.1 |
| OC301         | CC311  | OC301  | 5     | 116.5  | 376.56  | 0       | 0       |
| CC311         | OC301  | CC3162 | 5     | 109.7  | 794.96  | 0       | 0       |
| HCP1          | OC301  | CC311  | 5     | 106    | 418.4   | 0       | 0       |
| OC301         | CC311  | OC311  | 5     | 116.5  | 376.56  | 0       | 0       |
| OC311         | CC311  | HCA1   | 5     | 108.89 | 460.24  | 0       | 0       |
| CC311         | CC321  | HCA1   | 5     | 110.1  | 288.696 | 0.2179  | 18853.1 |
| HCA1          | CC321  | OC311  | 5     | 108.89 | 460.24  | 0       | 0       |
| HCA1          | CC321  | HCA2   | 5     | 109    | 297.064 | 0.1802  | 4518.72 |
| Dihedraltypes |        |        |       |        |         |         |         |
| i             | j      | k      | l     | func   | phi0    | kphi    | mult    |
| CC3162        | CC3161 | OC301  | CC311 | 9      | 0       | 0.92048 | 1       |

|        |        |       |       |   |     |          |   |
|--------|--------|-------|-------|---|-----|----------|---|
| CC3162 | CC3161 | OC301 | CC311 | 9 | 180 | 1.17152  | 2 |
| CC3162 | CC3161 | OC301 | CC311 | 9 | 0   | 3.72376  | 3 |
| CC3161 | CC3161 | OC301 | CC311 | 9 | 0   | 0.92048  | 1 |
| CC3161 | CC3161 | OC301 | CC311 | 9 | 180 | 1.17152  | 2 |
| CC3161 | CC3161 | OC301 | CC311 | 9 | 0   | 3.72376  | 3 |
| HCA1   | CC3161 | OC301 | CC311 | 9 | 0   | 1.188256 | 3 |
| CC3161 | OC301  | CC311 | CC321 | 9 | 0   | 1.6736   | 1 |
| CC3161 | OC301  | CC311 | CC321 | 9 | 0   | 2.05016  | 3 |
| CC3161 | OC301  | CC311 | OC301 | 9 | 180 | 0.2092   | 1 |
| CC3161 | OC301  | CC311 | OC301 | 9 | 0   | 3.80744  | 2 |
| CC3161 | OC301  | CC311 | OC301 | 9 | 180 | 5.31368  | 3 |
| CC3161 | OC301  | CC311 | HCA1  | 9 | 0   | 1.188256 | 3 |
| CC3163 | CC3161 | OC301 | CC311 | 9 | 0   | 0.92048  | 1 |
| CC3163 | CC3161 | OC301 | CC311 | 9 | 180 | 1.17152  | 2 |
| CC3163 | CC3161 | OC301 | CC311 | 9 | 0   | 3.72376  | 3 |
| CC311  | OC301  | CC311 | HCA1  | 9 | 0   | 1.188256 | 3 |
| CC311  | OC301  | CC311 | CC311 | 9 | 0   | 1.6736   | 1 |
| CC311  | OC301  | CC311 | CC311 | 9 | 0   | 2.05016  | 3 |
| CC311  | OC301  | CC311 | CC321 | 9 | 0   | 1.6736   | 1 |
| CC311  | OC301  | CC311 | CC321 | 9 | 0   | 2.05016  | 3 |
| CC311  | OC301  | CC311 | OC301 | 9 | 180 | 0.2092   | 1 |
| CC311  | OC301  | CC311 | OC301 | 9 | 0   | 3.80744  | 2 |
| CC311  | OC301  | CC311 | OC301 | 9 | 180 | 5.31368  | 3 |
| OC301  | CC311  | CC311 | OC301 | 9 | 0   | 0.29288  | 1 |
| OC301  | CC311  | CC311 | OC301 | 9 | 180 | 8.32616  | 2 |
| OC301  | CC311  | CC311 | OC301 | 9 | 180 | 7.19648  | 3 |
| OC301  | CC311  | CC311 | OC301 | 9 | 180 | 5.60656  | 1 |
| OC301  | CC311  | CC311 | OC301 | 9 | 0   | 4.97896  | 2 |
| OC301  | CC311  | CC311 | OC301 | 9 | 0   | 10.79472 | 3 |
| HCA1   | CC311  | CC311 | OC301 | 9 | 180 | 0.2092   | 6 |
| HCA1   | CC311  | CC311 | HCA1  | 9 | 0   | 0.8368   | 3 |
| HCA1   | CC311  | CC311 | CC321 | 9 | 0   | 0.8368   | 3 |
| CC321  | CC311  | CC311 | OC301 | 9 | 0   | 0.79496  | 3 |
| OC301  | CC311  | CC311 | OC311 | 9 | 180 | 11.0876  | 1 |
| OC301  | CC311  | CC311 | OC311 | 9 | 0   | 0        | 2 |
| OC301  | CC311  | CC311 | OC311 | 9 | 180 | 0.54392  | 3 |
| OC301  | CC311  | CC321 | HCA2  | 9 | 0   | 0.8368   | 3 |
| CC321  | CC311  | CC311 | CC321 | 9 | 0   | 0.8368   | 3 |
| HCA1   | CC311  | CC321 | HCA2  | 9 | 0   | 0.8368   | 3 |
| HCA1   | CC311  | CC311 | OC311 | 9 | 0   | 0.58576  | 3 |
| CC311  | CC311  | CC311 | HCA2  | 9 | 0   | 0.8368   | 3 |
| CC311  | CC311  | CC311 | OC311 | 9 | 0   | 1.4644   | 1 |
| CC311  | CC311  | CC311 | OC311 | 9 | 0   | 2.88696  | 2 |
| CC311  | CC311  | CC311 | OC311 | 9 | 180 | 11.67336 | 3 |
| HCA1   | CC311  | CC321 | OC311 | 9 | 0   | 0.58576  | 3 |
| OC301  | CC311  | CC321 | OC311 | 9 | 180 | 11.0876  | 1 |

|        |       |        |        |   |     |          |   |
|--------|-------|--------|--------|---|-----|----------|---|
| OC301  | CC311 | CC321  | OC311  | 9 | 0   | 0        | 2 |
| OC301  | CC311 | CC321  | OC311  | 9 | 180 | 0.54392  | 3 |
| CC311  | CC311 | CC321  | HCA2   | 9 | 0   | 0.8368   | 3 |
| CC311  | CC311 | CC321  | OC311  | 9 | 0   | 1.4644   | 1 |
| CC311  | CC311 | CC321  | OC311  | 9 | 0   | 2.88696  | 2 |
| CC311  | CC311 | CC321  | OC311  | 9 | 180 | 11.67336 | 3 |
| CC311  | CC321 | OC311  | HCP1   | 9 | 0   | 1.4644   | 1 |
| CC311  | CC321 | OC311  | HCP1   | 9 | 0   | 1.54808  | 2 |
| CC311  | CC321 | OC311  | HCP1   | 9 | 180 | 0.79496  | 3 |
| CC3162 | OC301 | CC311  | HCA1   | 9 | 0   | 1.188256 | 3 |
| CC3162 | OC301 | CC311  | CC311  | 9 | 0   | 1.6736   | 1 |
| CC3162 | OC301 | CC311  | CC311  | 9 | 0   | 2.05016  | 3 |
| CC3162 | OC301 | CC311  | CC321  | 9 | 0   | 1.6736   | 1 |
| CC3162 | OC301 | CC311  | CC321  | 9 | 0   | 2.05016  | 3 |
| CC3162 | OC301 | CC311  | OC3C61 | 9 | 180 | 0.2092   | 1 |
| CC3162 | OC301 | CC311  | OC3C61 | 9 | 0   | 3.80744  | 2 |
| CC3162 | OC301 | CC311  | OC3C61 | 9 | 180 | 5.31368  | 3 |
| CC3162 | OC301 | CC311  | CC3161 | 9 | 0   | 1.6736   | 1 |
| CC3162 | OC301 | CC311  | CC3161 | 9 | 0   | 2.05016  | 3 |
| CC311  | OC301 | CC3162 | HCA1   | 9 | 0   | 1.188256 | 3 |
| CC311  | OC301 | CC3162 | OC3C61 | 9 | 180 | 0.2092   | 1 |
| CC311  | OC301 | CC3162 | OC3C61 | 9 | 0   | 3.80744  | 2 |
| CC311  | OC301 | CC3162 | OC3C61 | 9 | 180 | 5.31368  | 3 |
| CC311  | OC301 | CC3162 | CC3161 | 9 | 0   | 1.6736   | 1 |
| CC311  | OC301 | CC3162 | CC3161 | 9 | 0   | 2.05016  | 3 |
| HCP1   | OC301 | CC311  | HCA2   | 9 | 0   | 0.75312  | 3 |
| HCP1   | OC301 | CC311  | OC311  | 9 | 0   | 6.4852   | 1 |
| HCP1   | OC301 | CC311  | OC311  | 9 | 0   | 4.89528  | 2 |
| HCP1   | OC301 | CC311  | OC311  | 9 | 0   | 4.47688  | 3 |
| HCP1   | OC301 | CC311  | HCA1   | 9 | 0   | 0.75312  | 3 |
| HCP1   | OC301 | CC311  | CC311  | 9 | 0   | 1.00416  | 3 |
| HCP1   | OC301 | CC311  | CC311  | 9 | 0   | 0.58576  | 2 |
| HCP1   | OC301 | CC311  | CC311  | 9 | 0   | 4.72792  | 1 |
| HCP1   | OC301 | CC311  | CC321  | 9 | 0   | 1.00416  | 3 |
| HCP1   | OC301 | CC311  | CC321  | 9 | 0   | 0.58576  | 2 |
| HCP1   | OC301 | CC311  | CC321  | 9 | 0   | 4.72792  | 1 |
| CC311  | OC301 | CC311  | OC311  | 9 | 180 | 1.71544  | 1 |
| CC311  | OC301 | CC311  | OC311  | 9 | 0   | 3.72376  | 2 |
| CC311  | OC301 | CC311  | OC311  | 9 | 0   | 0.2092   | 3 |
| OC301  | CC311 | OC311  | HCP1   | 9 | 0   | 4.89528  | 1 |
| OC301  | CC311 | OC311  | HCP1   | 9 | 0   | 3.5564   | 2 |
| OC301  | CC311 | OC311  | HCP1   | 9 | 0   | 1.54808  | 3 |
| HCA1   | CC311 | OC311  | HCP1   | 9 | 0   | 0.75312  | 3 |
| CC321  | CC311 | OC311  | HCP1   | 9 | 0   | 1.4644   | 1 |
| CC321  | CC311 | OC311  | HCP1   | 9 | 0   | 1.54808  | 2 |
| CC321  | CC311 | OC311  | HCP1   | 9 | 180 | 0.79496  | 3 |

|       |       |       |       |   |     |         |   |
|-------|-------|-------|-------|---|-----|---------|---|
| OC311 | CC311 | CC321 | HCA1  | 9 | 0   | 0.58576 | 3 |
| OC311 | CC311 | CC321 | OC311 | 9 | 180 | 11.0876 | 1 |
| OC311 | CC311 | CC321 | OC311 | 9 | 0   | 0       | 2 |
| OC311 | CC311 | CC321 | OC311 | 9 | 180 | 0.54392 | 3 |
| OC311 | CC311 | CC321 | HCA2  | 9 | 0   | 0.8368  | 3 |
| HCA1  | CC321 | OC311 | HCP1  | 9 | 0   | 0.75312 | 3 |
| OC301 | CC311 | CC321 | HCA1  | 9 | 0   | 0.58576 | 3 |
| HCA1  | CC311 | CC321 | HCA1  | 9 | 0   | 0.8368  | 3 |

Equilibration was done via a well-trying 21-step method, with an extra step to set the system to the proper temperature for the given simulations, either 296K or 423K (23°C and 150°C).

**Table S3.** Equilibration scheme for 21+1 step process. Step 22 is to equilibrate the system at the temperature for simulation. The type represents the type of simulation, IE, NVT or NPT. For NPT pressure couplings are: B = Berendsen, PR = Parrinello-Rahman, I = Isotropic.

| Step | Time [ns] | Type     | Pressure [bar] | Temp [K] |
|------|-----------|----------|----------------|----------|
| 1    | 0.5       | NVT      | -              | 600      |
| 2    | 0.25      | NVT      | -              | 300      |
| 3    | 0.5       | NPT B I  | 98.692         | 300      |
| 4    | 0.25      | NVT      | -              | 600      |
| 5    | 0.5       | NVT      | -              | 300      |
| 6    | 0.5       | NPT B I  | 2960.77        | 300      |
| 7    | 0.5       | NVT      | -              | 600      |
| 8    | 0.5       | NVT      | -              | 300      |
| 9    | 0.5       | NPT B I  | 4934.616       | 300      |
| 10   | 0.25      | NVT      | -              | 600      |
| 11   | 0.5       | NVT      | -              | 300      |
| 12   | 0.5       | NPT B I  | 2467.308       | 300      |
| 13   | 0.25      | NVT      | -              | 600      |
| 14   | 0.5       | NVT      | -              | 300      |
| 15   | 0.25      | NPT B I  | 493.4616       | 300      |
| 16   | 0.25      | NVT      | -              | 600      |
| 17   | 0.5       | NVT      | -              | 300      |
| 18   | 0.5       | NPT B I  | 49.34616       | 300      |
| 19   | 0.25      | NVT      | -              | 600      |
| 20   | 0.5       | NVT      | -              | 300      |
| 21   | 20        | NPT PR I | 1              | 300      |
| 22   | 10        | NPT PR I | 1              | 293/423  |

Tensile simulations was performed using Parrinello-Rahman semiisotropic pressure coupling for 6/7 ns, until the initial box length was stretched over 100%. It was deformed at a rate of 0.001 nm/ps in one direction (X).
